# Supplementary material for: Labor market exit around retirement age in Sweden and trajectories of psychotropic drugs in a context of downsizing
Source: Springer Nature journal article supplement (doi:10.1186/s12889-020-08589-6), 2020-05-05
Supplement: MOESM1 [file 17955808]

|                           | Pre exit         | Peri exit        | Post exit        |
|---------------------------|------------------|------------------|------------------|
|                           | '-1 vs -4'       | '+1 vs -1'       | '+4 vs +1'       |
| <u>Old-age retirement</u> |                  |                  |                  |
| <i>Antidepressants</i>    |                  |                  |                  |
| Downsizing                | 0.90 (0.82-0.99) | 0.92 (0.86-0.98) | 0.94 (0.86-1.03) |
| No downsizing             | 0.90 (0.85-0.95) | 0.88 (0.85-0.92) | 0.92 (0.87-0.97) |
| <i>Sedatives</i>          |                  |                  |                  |
| Downsizing                | 1.01 (0.93-1.10) | 0.96 (0.91-1.01) | 1.00 (0.93-1.08) |
| No downsizing             | 0.99 (0.94-1.04) | 0.92 (0.89-0.95) | 1.02 (0.98-1.07) |
| <i>Anxiolytics</i>        |                  |                  |                  |
| Downsizing                | 1.04 (0.92-1.17) | 0.93 (0.86-1.01) | 0.97 (0.88-1.07) |
| No downsizing             | 0.95 (0.88-1.02) | 0.97 (0.92-1.02) | 0.97 (0.91-1.03) |
|                           |                  |                  |                  |
| <u>SA/DP</u>              |                  |                  |                  |
| <i>Antidepressants</i>    |                  |                  |                  |
| Downsizing                | 1.30 (1.18-1.45) | 0.94 (0.88-1.00) | 0.86 (0.78-0.95) |
| No downsizing             | 1.40 (1.30-1.50) | 0.88 (0.84-0.92) | 0.93 (0.87-1.00) |
| <i>Sedatives</i>          |                  |                  |                  |
| Downsizing                | 1.23 (1.10-1.37) | 1.01 (0.94-1.08) | 1.02 (0.93-1.12) |
| No downsizing             | 1.27 (1.18-1.37) | 0.92 (0.88-0.96) | 0.99 (0.93-1.06) |
| <i>Anxiolytics</i>        |                  |                  |                  |
| Downsizing                | 1.34 (1.17-1.53) | 0.97 (0.90-1.06) | 1.00 (0.89-1.11) |
| No downsizing             | 1.41 (1.28-1.55) | 0.98 (0.92-1.04) | 1.05 (0.97-1.13) |
|                           |                  |                  |                  |
| <u>Unemployment</u>       |                  |                  |                  |
| <i>Antidepressants</i>    |                  |                  |                  |
| Downsizing                | 1.13 (0.94-1.36) | 1.02 (0.90-1.15) | 0.93 (0.78-1.10) |
| No downsizing             | 0.88 (0.78-0.99) | 0.88 (0.80-0.96) | 0.80 (0.71-0.91) |
| <i>Sedatives</i>          |                  |                  |                  |
| Downsizing                | 1.01 (0.85-1.21) | 0.92 (0.82-1.04) | 0.95 (0.81-1.11) |
| No downsizing             | 0.93 (0.82-1.06) | 0.88 (0.81-0.96) | 1.03 (0.91-1.15) |
| <i>Anxiolytics</i>        |                  |                  |                  |
| Downsizing                | 0.92 (0.73-1.17) | 1.02 (0.87-1.19) | 1.10 (0.89-1.36) |
| No downsizing             | 1.01 (0.86-1.20) | 0.94 (0.84-1.05) | 0.92 (0.79-1.06) |
|                           |                  |                  |                  |
